# Supplementary material for: The assessment of patients undergoing cardiac surgery for Covid-19: Complications occurring during cardiopulmonary bypass
Source: PubMed Central journal article supplement (PMC9069560; doi:10.1177/02676591211018983), 2021-05-27
Supplement: sj-pdf-1-prf-10.1177_02676591211018983.pdf [file sj-pdf-1-prf-10.1177_02676591211018983.pdf]

Appendix.

Appendix.

Figure 1. Query list with definitions for COVID-19 in case documentation system.

|                                     |                                                                                                   |                                                                                                                                   |
|-------------------------------------|---------------------------------------------------------------------------------------------------|-----------------------------------------------------------------------------------------------------------------------------------|
| COVID-19 Assessment                 | Did the patient have preoperative testing for COVID-19?<br>If so, what was the result?            | No<br>Unknown<br>Yes – Negative Result<br>Yes – Positive Result<br>Antigen                                                        |
| COVID-19 Test Type                  | If the patient was tested for COVID-19, what type of test was administered?                       | N/A<br>Nasal Swab<br>Other                                                                                                        |
| COVID-19 Surgery Status             | If the patient tested positive for COVID-19 initially, was the surgery delayed?                   | N/A<br>No<br>Yes – For 14 days<br>Yes – Until tested negative                                                                     |
| COVID-19 Surgery Post Initial Delay | If the surgery delayed, was the surgery performed after the patient tested negative for COVID-19? | N/A<br>No<br>Unknown<br>Yes                                                                                                       |
| Complications                       | Were there any complications encountered in the intraoperative period?                            | No<br>Yes                                                                                                                         |
| Complication: Coagulation           | Were there any complications encountered in the intraoperative period?                            | No<br>Yes – Clots in circuit of field<br>Yes – Heparin resistant<br>Yes – Both HR and clots circ. or field                        |
| Complication: Gas Exchange          | Was there a complication with gas exchange during CPB?                                            | No<br>Yes – Higher than expected FiO2 norm PaCO2<br>Yes – Higher than expected sweep norm PaCO2<br>Yes – Both high FiO2 and sweep |
